# Supplementary material
Source: bioRxiv or medRxiv preprint supplement (https://www.biorxiv.org/highwire/filestream/89717/field_highwire_adjunct_files/2/289249-3.pdf)
Supplement: Supplementary file [file 289249-3.pdf]

**Data Sheet 3.** Herd immunity thresholds ( $I_c$ ) values based on a range of basic reproductive number ( $R_0$ ) values that cover the range reported for Ebolaviruses (numerical data underlying Figure 3A).

| $R_0$ | $I_c = 1 - (1/R_0)$ |
|-------|---------------------|
| 1     | 0                   |
| 1.25  | 20.0                |
| 1.5   | 33.3                |
| 1.75  | 42.9                |
| 2     | 50.0                |
| 2.5   | 60.0                |
| 3     | 66.7                |
| 4     | 75.0                |
| 5     | 80.0                |
| 6     | 83.3                |
| 7     | 85.7                |
| 8     | 87.5                |
| 9     | 88.9                |
| 10    | 90.0                |
| 11    | 90.9                |
| 12    | 91.7                |
| 15    | 93.3                |
| 20    | 95.0                |

Critical vaccine coverage  $V_c$  values based on basic reproductive number ( $R_0$ ) values that cover the range reported for Ebolaviruses and vaccine efficacies ( $E$ ) that are in the range of those reported for approved vaccines (numerical data underlying Figure 3B).

| $R_0$ | $V_c = I_0/E$ |           |           |           |           |            |            |           |
|-------|---------------|-----------|-----------|-----------|-----------|------------|------------|-----------|
|       | $E = 0.5$     | $E = 0.6$ | $E = 0.7$ | $E = 0.8$ | $E = 0.9$ | $E = 0.95$ | $E = 0.99$ | $E = 1.0$ |
| 1     | 0             | 0         | 0         | 0         | 0         | 0          | 0          | 0         |
| 1.25  | 40.0          | 33.3      | 28.6      | 25        | 22.2      | 21.1       | 20.2       | 20.0      |
| 1.5   | 66.7          | 55.6      | 47.6      | 41.7      | 37.0      | 35.1       | 33.7       | 33.3      |
| 1.75  | 85.7          | 71.4      | 61.2      | 53.6      | 47.6      | 45.1       | 43.3       | 42.9      |
| 2     | 100           | 83.3      | 71.4      | 62.5      | 55.6      | 52.6       | 50.5       | 50.0      |
| 2.5   | 120           | 100       | 85.7      | 75.0      | 66.7      | 63.2       | 60.6       | 60.0      |
| 3     | 133           | 111       | 95.2      | 83.3      | 74.1      | 70.2       | 67.3       | 66.7      |
| 4     | 150           | 125       | 107       | 93.8      | 83.3      | 78.9       | 75.8       | 75.0      |
| 5     | 160           | 133       | 114       | 100.0     | 88.9      | 84.2       | 80.8       | 80.0      |
| 6     | 167           | 1389      | 119       | 104       | 92.6      | 87.7       | 84.2       | 83.3      |
| 7     | 171           | 143       | 122       | 107       | 95.2      | 90.2       | 86.6       | 85.7      |
| 8     | 175           | 146       | 125       | 109       | 97.2      | 92.1       | 88.4       | 87.5      |
| 9     | 178           | 148       | 127       | 111       | 98.8      | 93.6       | 89.8       | 88.9      |
| 10    | 180           | 150       | 129       | 113       | 100       | 94.7       | 90.9       | 90.0      |
| 11    | 182           | 152       | 130       | 114       | 101       | 95.7       | 91.8       | 90.9      |
| 12    | 183           | 153       | 131       | 115       | 102       | 96.5       | 92.6       | 91.7      |
| 15    | 187           | 156       | 133       | 117       | 104       | 98.2       | 94.3       | 93.3      |
| 20    | 190           | 158       | 136       | 119       | 106       | 100        | 96.0       | 95.0      |
